# Supplementary material for: Differential Cytotoxicity Induced by Transition Metal Oxide Nanoparticles is a Function of Cell Killing and Suppression of Cell Proliferation
Source: Int J Mol Sci. 2020 Mar 3;21(5):1731. doi: 10.3390/ijms21051731 (PMC7084189; doi:10.3390/ijms21051731)
Supplement: Supplementary file 1 [file ijms-21-01731-s001.pdf]

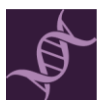

## Supplementary Materials

# Differential Cytotoxicity Induced by Transition Metal Oxide Nanoparticles is a Function of Cell Killing and Suppression of Cell Proliferation

Larry M. Tolliver <sup>1</sup>, Natalie J. Holl <sup>1</sup>, Fang Yao Stephen Hou <sup>2</sup>, Han-Jung Lee <sup>3</sup>, Melissa H. Cambre <sup>1</sup> and Yue-Wern Huang <sup>1,\*</sup>

<sup>1</sup> Department of Biological Sciences, Missouri University of Science and Technology, Rolla, MO 65409, USA; larry.tolliver@thermofisher.com (L.M.T.); njhcm8@mst.edu (N.J.H.); mhcxv8@mst.edu (M.H.C.)

<sup>2</sup> Department of Biomedical Sciences, University of Wisconsin-Milwaukee, Milwaukee, WI 53211, USA; fyshou@gmail.com

<sup>3</sup> Department of Natural Resources and Environmental Studies, National Dong Hwa University, Hualien 97401, Taiwan; hjlee@gms.ndhu.edu.tw

\* Correspondence: huangy@mst.edu; Tel.: 1-573-341-6589

**Supplementary Table S1:** Morphology, APS and SSA of metal oxide nanoparticles [1].

|                                          | TiO <sub>2</sub> | Cr <sub>2</sub> O <sub>3</sub> | Mn <sub>2</sub> O <sub>3</sub> | Fe <sub>2</sub> O <sub>3</sub> | NiO               | CuO               | ZnO                  |
|------------------------------------------|------------------|--------------------------------|--------------------------------|--------------------------------|-------------------|-------------------|----------------------|
| SSA (m <sup>2</sup> /g)                  | 179              | 11.4                           | 8.7                            | 31.4                           | 70.9              | 9                 | 44.6                 |
| APS (nm)                                 | 46 ± 20          | 63 ± 34                        | 82 ± 31                        | 48 ± 13                        | 16 ± 5            | 47 ± 2            | 27 ± 1               |
| Morphology                               | Rod-like shape   | Roughly spherical              | Roughly spherical              | Roughly spherical              | Roughly spherical | Roughly spherical | Spherical / Rod-like |
| From Data Sheet Supplied by Manufacturer |                  |                                |                                |                                |                   |                   |                      |
| SSA (m <sup>2</sup> /g)                  | 160              | N/A                            | N/A                            | 40                             | 50–80             | N/A               | 50                   |
| APS (nm)                                 | 50               | 60                             | 30–60                          | 20–30                          | 10–20             | 30–50             | 20                   |

**Supplementary Table S2:** Cell viability after 24-h exposure to NPs. Each experiment was repeated three times independently with each treatment group having triplicate samples. Data are presented as mean ± standard deviation. Red numbers are significantly different from the control.

| Nanoparticle                   | Nanoparticle Concentration (µg/mL) |             |             |             |             |             |
|--------------------------------|------------------------------------|-------------|-------------|-------------|-------------|-------------|
|                                | 0                                  | 10          | 25          | 50          | 75          | 100         |
| Cr <sub>2</sub> O <sub>3</sub> | 100.0 ± 0.0                        | 100.7 ± 1.7 | 95.3 ± 4.8  | 93.8 ± 1.6  | 98.6 ± 6.1  | 98.9 ± 7.0  |
| Fe <sub>2</sub> O <sub>3</sub> | 100.0 ± 0.0                        | 102.2 ± 9.3 | 100.6 ± 8.0 | 102.9 ± 7.0 | 104.4 ± 8.1 | 106.2 ± 6.5 |
| TiO <sub>2</sub>               | 100.0 ± 0.0                        | 96.3 ± 1.6  | 81.1 ± 7.0  | 77.4 ± 3.0  | 79.1 ± 3.2  | 76.2 ± 5.1  |
| NiO                            | 100.0 ± 0.0                        | 82.1 ± 0.8  | 62.4 ± 1.4  | 55.8 ± 0.8  | 52.5 ± 2.5  | 36.8 ± 4.6  |
| Mn <sub>2</sub> O <sub>3</sub> | 100.0 ± 0.0                        | 85.6 ± 4.2  | 58.1 ± 1.9  | 45.9 ± 2.0  | 39.1 ± 7.2  | 40.4 ± 5.5  |
| Nanoparticle                   | Nanoparticle Concentration (µg/mL) |             |             |             |             |             |
|                                | 0                                  | 4           | 8           | 12          | 16          | 20          |
| ZnO                            | 100.0 ± 0.0                        | 100.1 ± 3.4 | 94.0 ± 3.4  | 73.4 ± 12.8 | 48.6 ± 2.1  | 6.8 ± 1.9   |
| CuO                            | 100.0 ± 0.0                        | 24.8 ± 2.6  | 10.4 ± 2.2  | 7.7 ± 2.2   | 5.4 ± 1.6   | 3.5 ± 1.0   |

**Supplementary Table S3:** Cell viability after 48-h exposure to NPs. Each experiment was repeated three times independently with each treatment group having triplicate samples. Data are presented as mean  $\pm$  standard deviation. Red numbers are significantly different from the control.

| Nanoparticle                       | Nanoparticle Concentration ( $\mu\text{g/mL}$ ) |                 |                 |                 |                 |                 |
|------------------------------------|-------------------------------------------------|-----------------|-----------------|-----------------|-----------------|-----------------|
|                                    | 0                                               | 10              | 25              | 50              | 75              | 100             |
| <b>Cr<sub>2</sub>O<sub>3</sub></b> | 100.0 $\pm$ 0.0                                 | 106.1 $\pm$ 3.9 | 101.6 $\pm$ 2.4 | 104.5 $\pm$ 6.4 | 102.7 $\pm$ 3.1 | 104.5 $\pm$ 8.0 |
| <b>Fe<sub>2</sub>O<sub>3</sub></b> | 100.0 $\pm$ 0.0                                 | 104.4 $\pm$ 4.7 | 100.9 $\pm$ 4.8 | 100.0 $\pm$ 3.6 | 98.3 $\pm$ 3.7  | 92.8 $\pm$ 3.0  |
| <b>TiO<sub>2</sub></b>             | 100.0 $\pm$ 0.0                                 | 96.8 $\pm$ 2.4  | 84.8 $\pm$ 0.6  | 78.7 $\pm$ 1.1  | 77.7 $\pm$ 3.0  | 72.8 $\pm$ 4.7  |
| <b>NiO</b>                         | 100.0 $\pm$ 0.0                                 | 58.7 $\pm$ 3.2  | 36.6 $\pm$ 4.0  | 30.2 $\pm$ 3.0  | 22.8 $\pm$ 2.0  | 9.7 $\pm$ 1.8   |
| <b>Mn<sub>2</sub>O<sub>3</sub></b> | 100.0 $\pm$ 0.0                                 | 80.6 $\pm$ 6.4  | 35.2 $\pm$ 5.8  | 20.6 $\pm$ 4.5  | 17.6 $\pm$ 5.7  | 15.7 $\pm$ 5.1  |
|                                    | 0                                               | 4               | 8               | 12              | 16              | 20              |
| <b>ZnO</b>                         | 100.0 $\pm$ 0.0                                 | 92.2 $\pm$ 5.3  | 48.4 $\pm$ 3.4  | 4.4 $\pm$ 3.2   | 1.6 $\pm$ 0.1   | 1.6 $\pm$ 0.6   |
| <b>CuO</b>                         | 100.0 $\pm$ 0.0                                 | 30.6 $\pm$ 6.8  | 15.5 $\pm$ 4.1  | 11.8 $\pm$ 5.8  | 8.8 $\pm$ 4.4   | 6.6 $\pm$ 2.9   |

**Supplementary Table S4:** Apoptosis after 24-h exposure to NPs. Each experiment was repeated three times independently. Data are presented as mean  $\pm$  standard deviation. Red numbers are significantly different from the control.

| Nanoparticle                       | Nanoparticle Concentration ( $\mu\text{g/mL}$ ) |                |                |                |
|------------------------------------|-------------------------------------------------|----------------|----------------|----------------|
|                                    | 0                                               | 25             | 50             | 100            |
| <b>Cr<sub>2</sub>O<sub>3</sub></b> | 6.9 $\pm$ 1.4                                   | 7.2 $\pm$ 1.4  | 6.7 $\pm$ 0.8  | 5.8 $\pm$ 0.6  |
| <b>Fe<sub>2</sub>O<sub>3</sub></b> | 4.5 $\pm$ 1.4                                   | 4.6 $\pm$ 1.7  | 4.9 $\pm$ 1.6  | 5.8 $\pm$ 2.1  |
| <b>TiO<sub>2</sub></b>             | 4.6 $\pm$ 1.7                                   | 6.3 $\pm$ 2.4  | 9.0 $\pm$ 2.3  | 12.5 $\pm$ 2.9 |
| <b>NiO</b>                         | 4.7 $\pm$ 2.0                                   | 7.4 $\pm$ 2.6  | 7.8 $\pm$ 1.2  | 13.8 $\pm$ 2.5 |
| <b>Mn<sub>2</sub>O<sub>3</sub></b> | 4.6 $\pm$ 0.4                                   | 9.9 $\pm$ 3.2  | 17.3 $\pm$ 4.6 | 21.6 $\pm$ 5.4 |
|                                    | 0                                               | 5              | 10             | 20             |
| <b>ZnO</b>                         | 5.8 $\pm$ 2.6                                   | 5.1 $\pm$ 2.0  | 10.1 $\pm$ 2.1 | 77.5 $\pm$ 7.8 |
| <b>CuO</b>                         | 10.6 $\pm$ 2.4                                  | 70.2 $\pm$ 2.7 | 79.9 $\pm$ 1.5 | 88.2 $\pm$ 5.3 |

**Supplementary Table S5:** Apoptosis after 48-h exposure to NPs. Each experiment was repeated three times independently. Data are presented as mean  $\pm$  standard deviation. Red numbers are significantly different from the control.

| Nanoparticle                       | Nanoparticle Concentration ( $\mu\text{g/mL}$ ) |                |                |                |
|------------------------------------|-------------------------------------------------|----------------|----------------|----------------|
|                                    | 0                                               | 25             | 50             | 100            |
| <b>Cr<sub>2</sub>O<sub>3</sub></b> | 5.1 $\pm$ 1.4                                   | 4.9 $\pm$ 0.2  | 5.6 $\pm$ 0.9  | 3.5 $\pm$ 0.1  |
| <b>Fe<sub>2</sub>O<sub>3</sub></b> | 4.8 $\pm$ 0.6                                   | 5.0 $\pm$ 0.9  | 5.3 $\pm$ 1.0  | 6.2 $\pm$ 1.7  |
| <b>TiO<sub>2</sub></b>             | 3.0 $\pm$ 0.5                                   | 7.3 $\pm$ 2.0  | 7.1 $\pm$ 1.0  | 8.3 $\pm$ 0.2  |
| <b>NiO</b>                         | 1.9 $\pm$ 0.8                                   | 4.2 $\pm$ 0.6  | 6.6 $\pm$ 0.2  | 7.1 $\pm$ 1.1  |
| <b>Mn<sub>2</sub>O<sub>3</sub></b> | 2.7 $\pm$ 0.2                                   | 7.5 $\pm$ 2.2  | 13.3 $\pm$ 4.0 | 23.8 $\pm$ 7.2 |
|                                    | 0                                               | 5              | 10             | 20             |
| <b>ZnO</b>                         | 3.7 $\pm$ 0.8                                   | 4.2 $\pm$ 1.4  | 4.3 $\pm$ 1.0  | 68.4 $\pm$ 6.3 |
| <b>CuO</b>                         | 4.0 $\pm$ 1.4                                   | 34.8 $\pm$ 9.0 | 54.6 $\pm$ 3.3 | 86.6 $\pm$ 4.6 |

**Supplementary Table S6:** Proliferation after 24-h exposure to NPs. Each experiment was repeated four times independently with each treatment group having quadruplicate samples. Data are presented as mean  $\pm$  standard deviation. Red numbers are significantly different from the control.

| Nanoparticle                   | Nanoparticle Concentration ( $\mu\text{g/mL}$ ) |                 |                 |                |                |                 |
|--------------------------------|-------------------------------------------------|-----------------|-----------------|----------------|----------------|-----------------|
|                                | 0                                               | 10              | 25              | 50             | 75             | 100             |
| Cr <sub>2</sub> O <sub>3</sub> | 100.0 $\pm$ 0.0                                 | 99.1 $\pm$ 4.3  | 96.4 $\pm$ 3.4  | 89.7 $\pm$ 1.2 | 84.5 $\pm$ 3.2 | 74.5 $\pm$ 10.4 |
| Fe <sub>2</sub> O <sub>3</sub> | 100.0 $\pm$ 0.0                                 | 94.0 $\pm$ 1.6  | 91.2 $\pm$ 3.2  | 85.4 $\pm$ 2.0 | 84.8 $\pm$ 5.2 | 79.6 $\pm$ 0.2  |
| TiO <sub>2</sub>               | 100.0 $\pm$ 0.0                                 | 90.8 $\pm$ 2.1  | 84.3 $\pm$ 1.7  | 78.8 $\pm$ 6.8 | 71.5 $\pm$ 9.2 | 69.6 $\pm$ 8.9  |
| NiO                            | 100.0 $\pm$ 0.0                                 | 86.6 $\pm$ 3.1  | 76.8 $\pm$ 4.2  | 63.1 $\pm$ 7.5 | 53.8 $\pm$ 4.4 | 43.8 $\pm$ 4.6  |
| Mn <sub>2</sub> O <sub>3</sub> | 100.0 $\pm$ 0.0                                 | 61.1 $\pm$ 13.9 | 31.2 $\pm$ 8.9  | 24.7 $\pm$ 8.5 | 19.6 $\pm$ 6.7 | 15.2 $\pm$ 5.5  |
|                                | 0                                               | 4               | 8               | 12             | 16             | 20              |
| ZnO                            | 100.0 $\pm$ 0.0                                 | 92.8 $\pm$ 5.9  | 71.3 $\pm$ 16.0 | 48.8 $\pm$ 6.1 | 12.5 $\pm$ 5.3 | 1.7 $\pm$ 0.3   |
| CuO                            | 100.0 $\pm$ 0.0                                 | 10.0 $\pm$ 4.9  | 4.0 $\pm$ 1.9   | 2.4 $\pm$ 1.1  | 1.8 $\pm$ 0.9  | 1.7 $\pm$ 0.6   |

**Supplementary Table S7:** Proliferation after 48-h exposure to NPs. Each experiment was repeated four times independently with each treatment group having quadruplicate samples. Data are presented as mean  $\pm$  standard deviation. Red numbers are significantly different from the control.

| Nanoparticle                   | Nanoparticle Concentration ( $\mu\text{g/mL}$ ) |                |                 |                 |                |                |
|--------------------------------|-------------------------------------------------|----------------|-----------------|-----------------|----------------|----------------|
|                                | 0                                               | 10             | 25              | 50              | 75             | 100            |
| Cr <sub>2</sub> O <sub>3</sub> | 100.0 $\pm$ 0.0                                 | 96.0 $\pm$ 3.0 | 92.4 $\pm$ 4.4  | 87.9 $\pm$ 3.4  | 86.2 $\pm$ 3.3 | 73.9 $\pm$ 5.6 |
| Fe <sub>2</sub> O <sub>3</sub> | 100.0 $\pm$ 0.0                                 | 96.4 $\pm$ 7.3 | 92.3 $\pm$ 5.7  | 88.1 $\pm$ 0.5  | 83.8 $\pm$ 3.6 | 75.3 $\pm$ 0.3 |
| TiO <sub>2</sub>               | 100.0 $\pm$ 0.0                                 | 83.1 $\pm$ 4.4 | 81.6 $\pm$ 1.5  | 76.8 $\pm$ 4.0  | 66.3 $\pm$ 2.4 | 61.6 $\pm$ 2.9 |
| NiO                            | 100.0 $\pm$ 0.0                                 | 80.5 $\pm$ 5.9 | 63.8 $\pm$ 7.5  | 46.8 $\pm$ 10.8 | 33.5 $\pm$ 6.7 | 21.6 $\pm$ 4.9 |
| Mn <sub>2</sub> O <sub>3</sub> | 100.0 $\pm$ 0.0                                 | 27.4 $\pm$ 6.3 | 16.1 $\pm$ 6.0  | 11.3 $\pm$ 3.3  | 7.8 $\pm$ 2.6  | 5.8 $\pm$ 2.2  |
|                                | 0                                               | 4              | 8               | 12              | 16             | 20             |
| ZnO                            | 100.0 $\pm$ 0.0                                 | 91.9 $\pm$ 5.0 | 77.2 $\pm$ 12.8 | 31.2 $\pm$ 14.8 | 1.9 $\pm$ 1.5  | 1.0 $\pm$ 0.7  |
| CuO                            | 100.0 $\pm$ 0.0                                 | 3.1 $\pm$ 1.9  | 1.3 $\pm$ 0.4   | 0.9 $\pm$ 0.1   | 0.7 $\pm$ 0.3  | 0.6 $\pm$ 0.3  |

**Supplementary Table S8:** Cell cycle distribution after 24- and 48-h exposure to NPs. Each experiment was repeated three times independently. Data are presented as mean  $\pm$  standard deviation. Red numbers are significantly different from the control.

| Nanoparticle | Phase                          | Nanoparticle Concentration ( $\mu\text{g/mL}$ ) |                |                |                |
|--------------|--------------------------------|-------------------------------------------------|----------------|----------------|----------------|
|              |                                | 0                                               | 5              | 10             | 20             |
| ZnO 24 h     | G <sub>0</sub> /G <sub>1</sub> | 58.4 $\pm$ 0.8                                  | 58.5 $\pm$ 2.3 | 58.3 $\pm$ 1.4 | 55.3 $\pm$ 2.8 |
|              | S                              | 35.4 $\pm$ 1.0                                  | 34.6 $\pm$ 1.9 | 33.8 $\pm$ 0.9 | 44.7 $\pm$ 2.8 |
|              | G <sub>2</sub> /M              | 6.2 $\pm$ 0.7                                   | 6.9 $\pm$ 0.5  | 7.8 $\pm$ 1.3  | 0.0 $\pm$ 0.0  |
| ZnO 48 h     | G <sub>0</sub> /G <sub>1</sub> | 61.6 $\pm$ 2.3                                  | 60.4 $\pm$ 2.0 | 58.7 $\pm$ 1.7 | 50.6 $\pm$ 2.3 |
|              | S                              | 31.1 $\pm$ 2.4                                  | 32.5 $\pm$ 0.7 | 34.7 $\pm$ 1.0 | 48.9 $\pm$ 2.9 |
|              | G <sub>2</sub> /M              | 7.4 $\pm$ 0.4                                   | 7.0 $\pm$ 1.3  | 6.6 $\pm$ 0.7  | 0.5 $\pm$ 0.7  |
| CuO 24 h     | G <sub>0</sub> /G <sub>1</sub> | 58.3 $\pm$ 1.2                                  | 64.7 $\pm$ 5.1 | 61.1 $\pm$ 1.2 | 54.4 $\pm$ 3.9 |
|              | S                              | 34.0 $\pm$ 0.1                                  | 34.9 $\pm$ 5.1 | 38.9 $\pm$ 1.2 | 45.6 $\pm$ 3.9 |
|              | G <sub>2</sub> /M              | 7.7 $\pm$ 1.1                                   | 0.4 $\pm$ 0.6  | 0.0 $\pm$ 0.0  | 0.0 $\pm$ 0.0  |
| CuO 48 h     | G <sub>0</sub> /G <sub>1</sub> | 60.3 $\pm$ 0.4                                  | 46.8 $\pm$ 0.5 | 44.0 $\pm$ 2.3 | 45.1 $\pm$ 0.3 |
|              | S                              | 33.2 $\pm$ 0.1                                  | 52.5 $\pm$ 1.5 | 54.9 $\pm$ 0.9 | 54.9 $\pm$ 0.3 |
|              | G <sub>2</sub> /M              | 6.6 $\pm$ 0.4                                   | 0.7 $\pm$ 1.0  | 1.1 $\pm$ 1.6  | 0.0 $\pm$ 0.0  |

**Supplementary Figure S1:** Cell cycle distributions calculated in FCS Express 6 for cells exposed to (A) 0 and (B) 20  $\mu\text{g/mL}$  of ZnO after 24 h

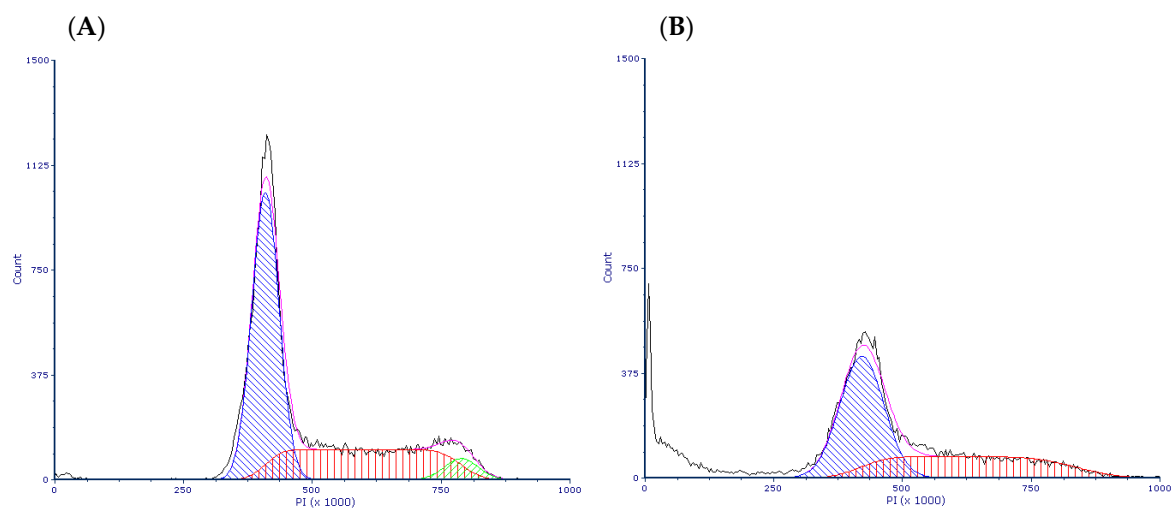

## References

1. Chusuei, C.C.; Wu, C.H.; Mallavarapu, S.; Hou, F.Y.; Hsu, C.M.; Winiarz, J.G.; Aronstam, R.S.; Huang, Y.W. Cytotoxicity in the age of nano: the role of fourth period transition metal oxide nanoparticle physicochemical properties. *Chem Biol Interact* **2013**, *206*, 319–326, doi:10.1016/j.cbi.2013.09.020.
